# Supplementary material for: The spin magnetic order of Con+ (n ≤ 5) clusters
Source: Royal Society of Chemistry journal article supplement (doi:10.1039/d2cp03643f), 2022-01-01
Supplement: d2cp03643f1.pdf [file d2cp03643f1.pdf]

## Supplementary information

### The spin magnetic order of $\text{Co}_n^+$ ( $n \leq 5$ ) clusters

Piero Ferrari<sup>1,2,\*</sup> and Silvia Gómez-Coca<sup>3,\*</sup>

<sup>1</sup>Quantum Solid-State Physics, Department of Physics and Astronomy, KU Leuven, Celestijnenlaan 200d, 3001 Leuven, Belgium

<sup>2</sup>Institute for Molecules and Materials, FELIX Laboratory, Radboud University, Toernooiveld 7, 6525 ED, Nijmegen, The Netherlands.

<sup>3</sup>Departament de Química Inorgànica i Orgànica and Institut de Recerca de Química Teòrica i Computacional, Universitat de Barcelona, Diagonal 645, 08028 Barcelona, Spain

\*piero.ferrari@kuleuven.be, silvia.gomez.coca@ub.edu

#### Content

1. Comparison of geometries optimized with different functionals for  $\text{Co}_3^+$  ( $M = 7$ )
2. Comparison of measured infrared spectra of  $\text{Co}_4^+$  and  $\text{Co}_5^+$  with calculations of vibrational frequencies
3. XYZ coordinates (in units of Å)

1. Comparison of geometries optimized with different functionals for  $\text{Co}_3^+$  ( $M = 7$ )

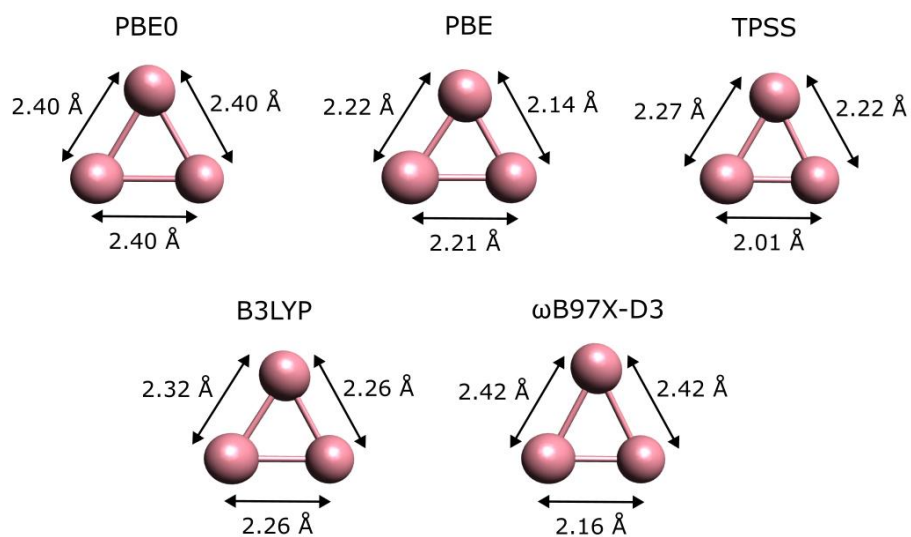

Figure S1. Comparison of the geometries of  $\text{Co}_3^+$  ( $M = 7$ ) optimized with different functionals.

2. Comparison of measured infrared spectra of  $\text{Co}_4^+$  and  $\text{Co}_5^+$  with calculations of vibrational frequencies

Table S1. Comparison of the vibrational bands measured for  $\text{Co}_4^+$  and  $\text{Co}_5^+$  (from Ref. [1]) and those calculated with DFT using the PBE0 functional (same level and for the computations presented in the main article).

| Cluster         | Experiment ( $\text{cm}^{-1}$ ) | DFT ( $\text{cm}^{-1}$ ) |
|-----------------|---------------------------------|--------------------------|
| $\text{Co}_4^+$ | $181 \pm 11$                    | 181                      |
|                 | $195 \pm 8$                     | 194                      |
| $\text{Co}_5^+$ | $197 \pm 21$                    | 204                      |
|                 | $220 \pm 13$                    | 210                      |
|                 | $242 \pm 11$                    | 242                      |

[1] R. Gehrke, P. Gruene, A. Fielicke, G. Meijer and K. Reuter, J. Chem. Phys., 130, 034306, 2009.

3. XYZ coordinates (in units of Å)

All XYZ files can be downloaded from [https://webdav.data.ru.nl/hfml-felix/felix-pub-2022-ferrari-pccp\\_dsc\\_499](https://webdav.data.ru.nl/hfml-felix/felix-pub-2022-ferrari-pccp_dsc_499)
